# Supplementary material for: Impact of pH on the fabrication of egg white reinforced soy protein composite microgels for gastrointestinal delivery purposes
Source: Royal Society of Chemistry journal article supplement (doi:10.1039/d4fo03997a), 2024-01-01
Supplement: d4fo03997a1.pdf [file d4fo03997a1.pdf]

Supplementary data

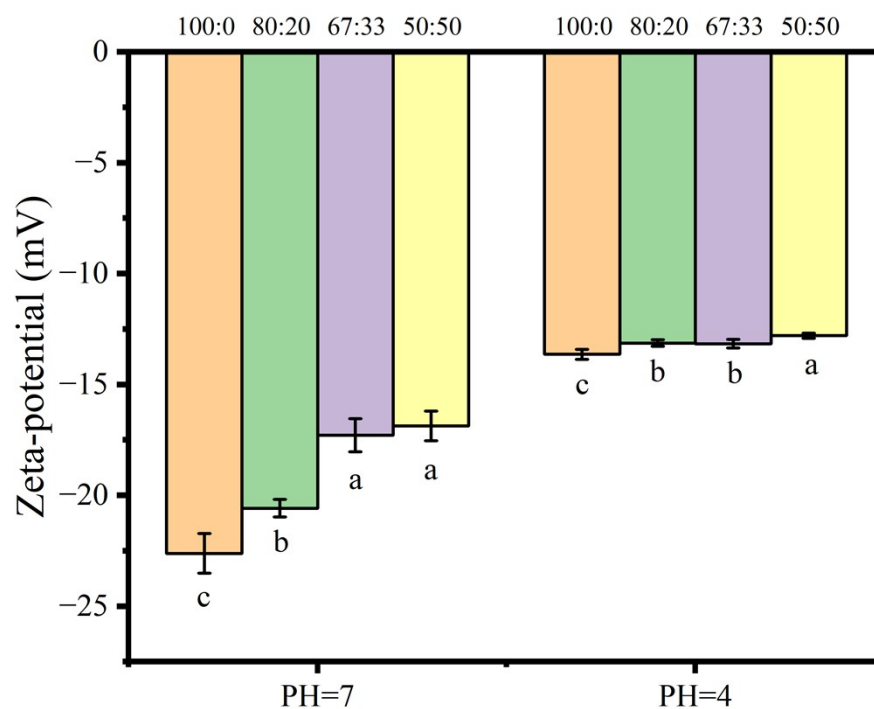

Figure S1. The zeta-potential values of SPI-EW complexes at different pH conditions.

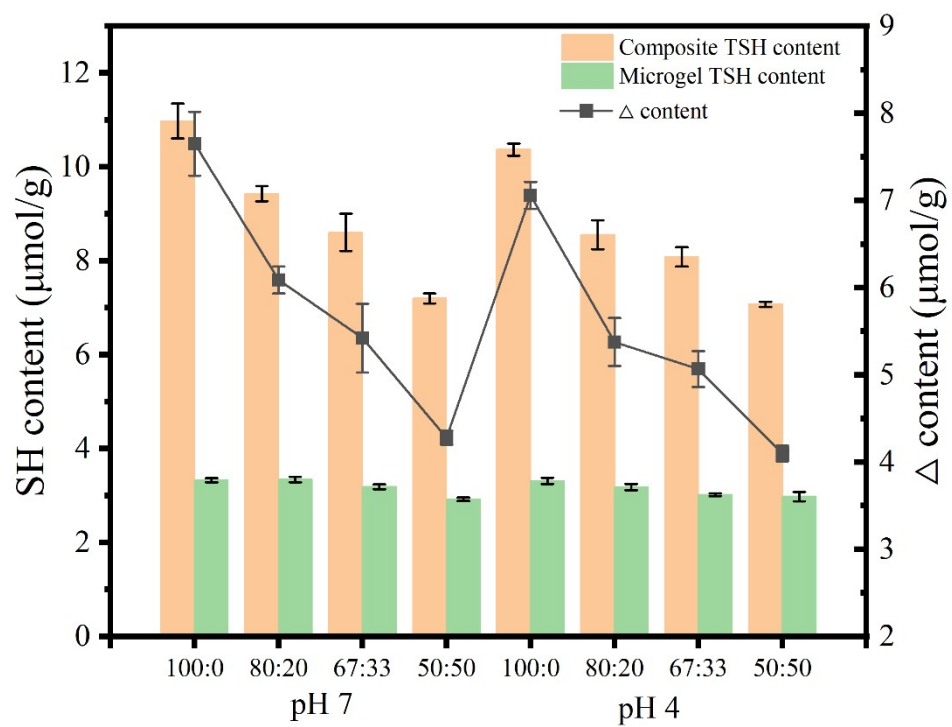

Figure S2. The free sulphydryl content in SPI-EW composites and microgel particles.
